# Supplementary material
Source: PubMed Central journal article supplement (PMC3752160)
Supplement: NIHMS496461-supplement-Supp_Table_S1.pdf [file NIHMS496461-supplement-Supp_Table_S1.pdf]

**Table S1:** AR/LV (%) and AI/AR (%) for the control, ANV-6L15 and hirudin treated groups and the *p* value for each group vs. control.

|                      | Control  | 2.5 µg/kg |          | 5.0 µg/kg |          | 10 µg/kg |          | 50 µg/kg |          | 250 µg/kg |          | Hirudin  |
|----------------------|----------|-----------|----------|-----------|----------|----------|----------|----------|----------|-----------|----------|----------|
| subgroup             |          | a         | b        | a         | b        | a        | b        | a        | b        | a         | b        |          |
| AR/LV (%)            | 38.4±3.8 | 33.1±2.8  | 39.3±5.7 | 36.4±7.3  | 40.9±2.0 | 34.9±3.7 | 39.6±2.8 | 39.6±2.8 | 36.9±2.5 | 37.7±4.2  | 33.3±1.7 | 34.9±4.2 |
| <i>P</i> vs. control | -        | 0.07      | 0.29     | 0.23      | 0.28     | 0.09     | 0.27     | 0.29     | 0.40     | 0.44      | 0.11     | 0.20     |
| AI/AR (%)            | 40.8±1.1 | 13.5±0.9  | 8.9±2.3  | 10.2±1.2  | 8.1±4.2  | 12.7±3.0 | 7.5±4.1  | 10.5±1.6 | 6.1±2.1  | 5.2±4.1   | 5.4±4.1  | 22.1±2.2 |
| <i>P</i> vs. control | -        | 0.005     | 0.008    | 0.004     | 0.008    | 0.005    | 0.01     | 0.007    | 0.007    | 0.005     | 0.004    | 0.05     |

a: ANV-6L15 injection before ischemia

b: ANV-6L15 injection after ischemia

AR/LV (%) for all groups = 37.1±2.6 %
